# Supplementary material
Source: MDPI journal article supplement (https://www.mdpi.com/2073-4344/8/4/162)
Supplement: s1 [file s1]

# Supplementary Materials: Mobility of NH<sub>3</sub>-Solvated Cu<sup>II</sup> Ions in Cu-SSZ-13 and Cu-ZSM-5 NH<sub>3</sub>-SCR Catalysts: A Comparative Impedance Spectroscopy Study

Valentina Rizzotto, Peirong Chen and Ulrich Simon

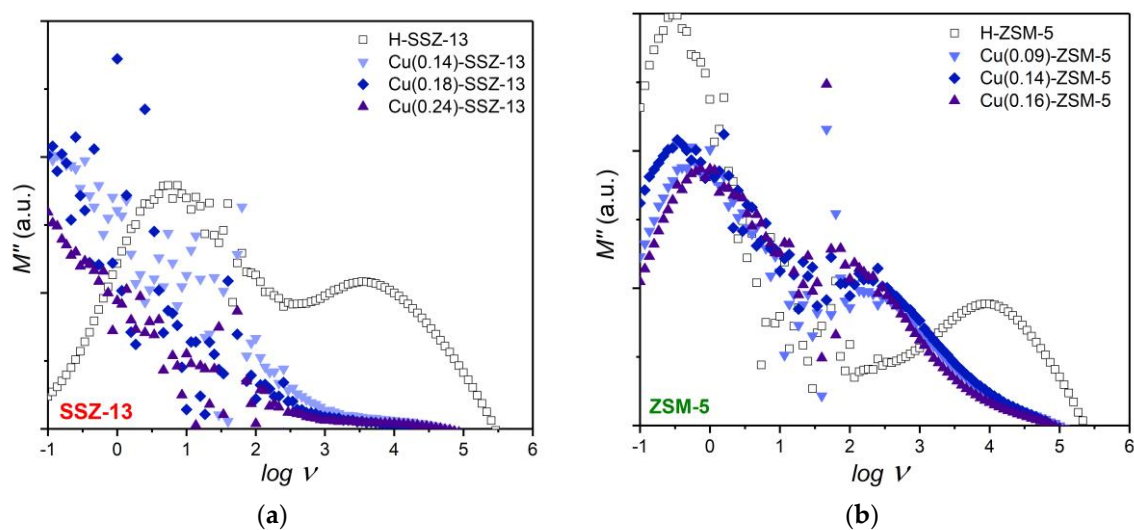

**Figure S1.** Modulus plots of *in situ* IS results collected in N<sub>2</sub> at 200 °C over H-form and Cu-exchanged (a) SSZ-13 and (b) ZSM-5 zeolites.
